# Supplementary material
Source: HighWire-hosted journal article supplement (https://erj.ersjournals.com/content/55/5/1901905)
Supplement: inline-supplementary-material-1 [file inline-supplementary-material-1.pdf]

## Supplement

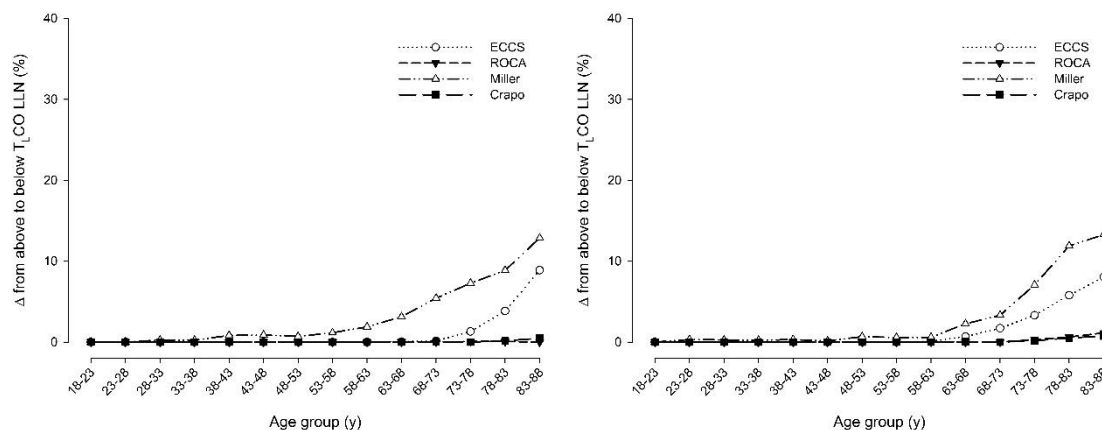

**Figure S1:** The proportion of females (a) and males (b) who changed from within the normal range to an abnormally low  $T_LCO$  result, when moving from each of the older equations to the GLI equations.

Table S1: Levels of agreement for a reduced  $T_LCO$  (below LLN) comparing GLI equations to each of the older reference equations, limited to the age range covered by each of the older equations.

|                     |        | Reduced $T_LCO$ % raw agreement (kappa) |             |                 |             |                 |
|---------------------|--------|-----------------------------------------|-------------|-----------------|-------------|-----------------|
| Equation vs GLI2017 |        | all                                     | females     | Age range (yrs) | males       | Age range (yrs) |
| Adults              | Miller | 94.7 (0.88)                             | 95.2 (0.89) | 18 - 85         | 94.3 (0.88) | 18 - 85         |
|                     | ECCS   | 88.5 (0.75)                             | 84.1 (0.66) | 18 - 70         | 93.0 (0.85) | 18 - 70         |
|                     | Roca   | 75.0 (0.52)                             | 68.7 (0.42) | 20 - 70         | 81.3 (0.63) | 20 - 70         |
|                     | Crapo  | 72.2 (0.48)                             | 67.0 (0.40) | 18 - 84         | 76.8 (0.56) | 18 - 85         |
| Children            | Kim    | 98.1 (0.96)                             | 98.6 (0.97) | 5 - 18          | 97.6 (0.95) | 5 - 18          |
|                     | Cotes  | 83.0 (0.67)                             | 81.5 (0.64) | 8-16            | 84.2 (0.69) | 8 - 16          |

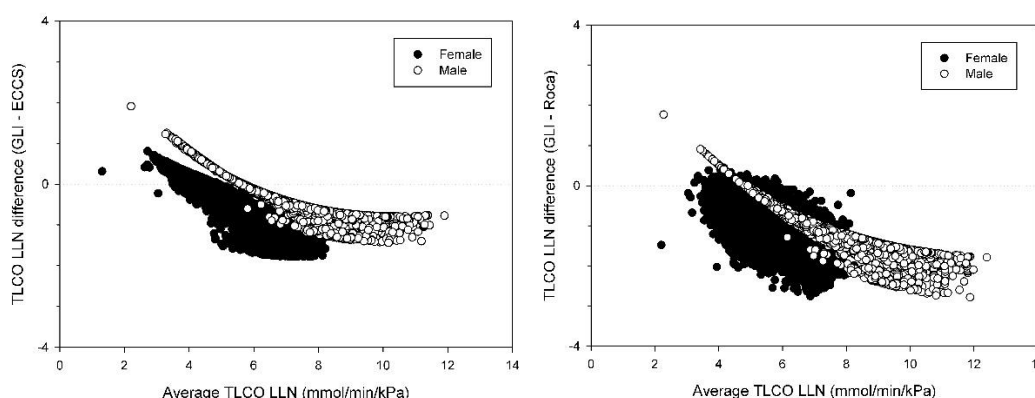

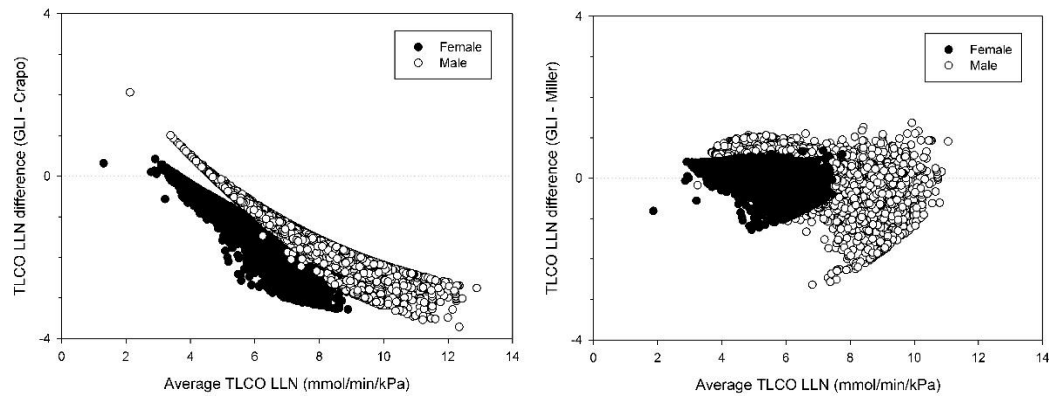

**Figure S2:** Bland-Altman plot comparing the  $T_LCO$  lower limit of normal for each of the older equations (a – ECCS, b - Roca, c – Crapo, d – Miller) with that of GLI for all adults.

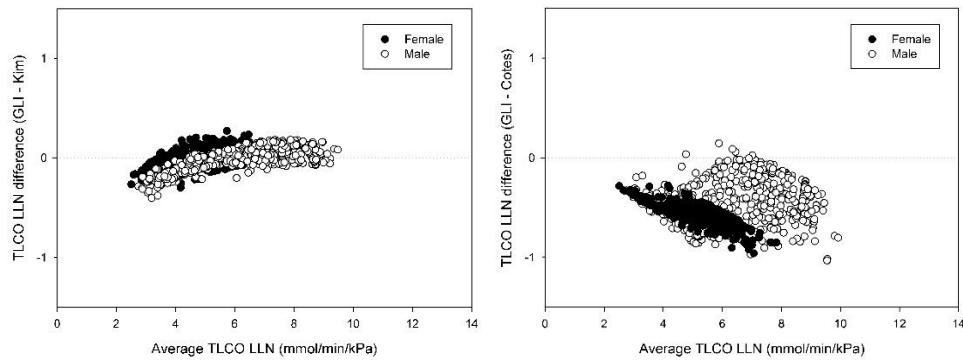

**Figure S3:** Bland-Altman plot comparing the  $T_LCO$  lower limit of normal for each of the older equations (a – Kim, b - Cotes) with that of GLI for all children.

**Table S2:** Median (95% confidence interval) of difference between the  $T_LCO$  LLN (mmol/min/kPa) for older equations and GLI for both males and females.

|                       | female               | male                 |
|-----------------------|----------------------|----------------------|
| Miller ( $\geq 18y$ ) | 0.11 (-0.36, 0.37)   | 0.17 (-0.58, 0.64)   |
| Roca ( $\geq 18y$ )   | -1.11 (-1.78, -0.29) | -0.95 (-1.61, -0.09) |
| ECCS ( $\geq 18y$ )   | -0.42 (-1.33, 0.20)  | -0.29 (-0.80, 0.44)  |
| Crapo ( $\geq 18y$ )  | -1.19 (-2.27, -0.40) | -1.32 (-2.27, -0.23) |
| Kim ( $< 18y$ )       | 0.01 (-0.14, 0.15)   | -0.01 (-0.22, 0.15)  |
| Cotes ( $< 18y$ )     | -0.58 (-0.77, -0.39) | -0.43 (-0.79, -0.08) |

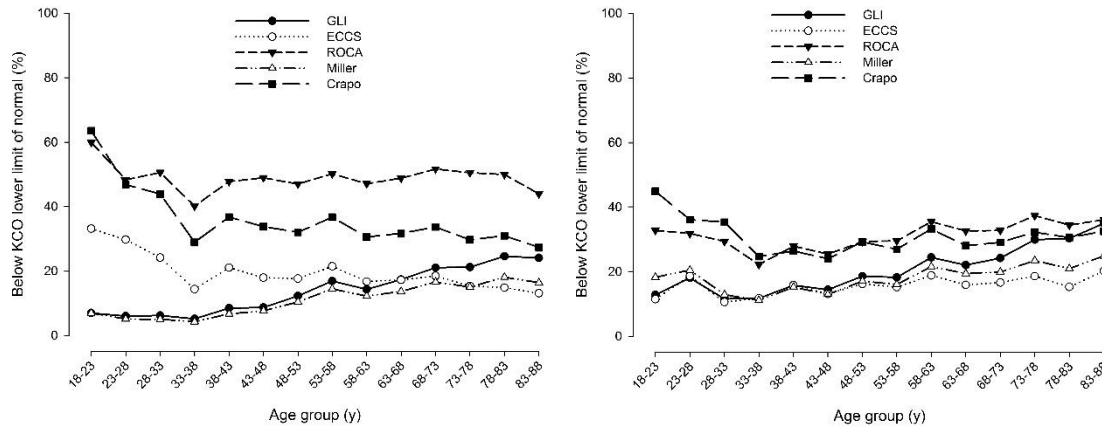

**Figure S4:** Mean KCO lower limit of normal (LLN) for each of the adult reference equations as a function of age, separated into females (a) and males (b).

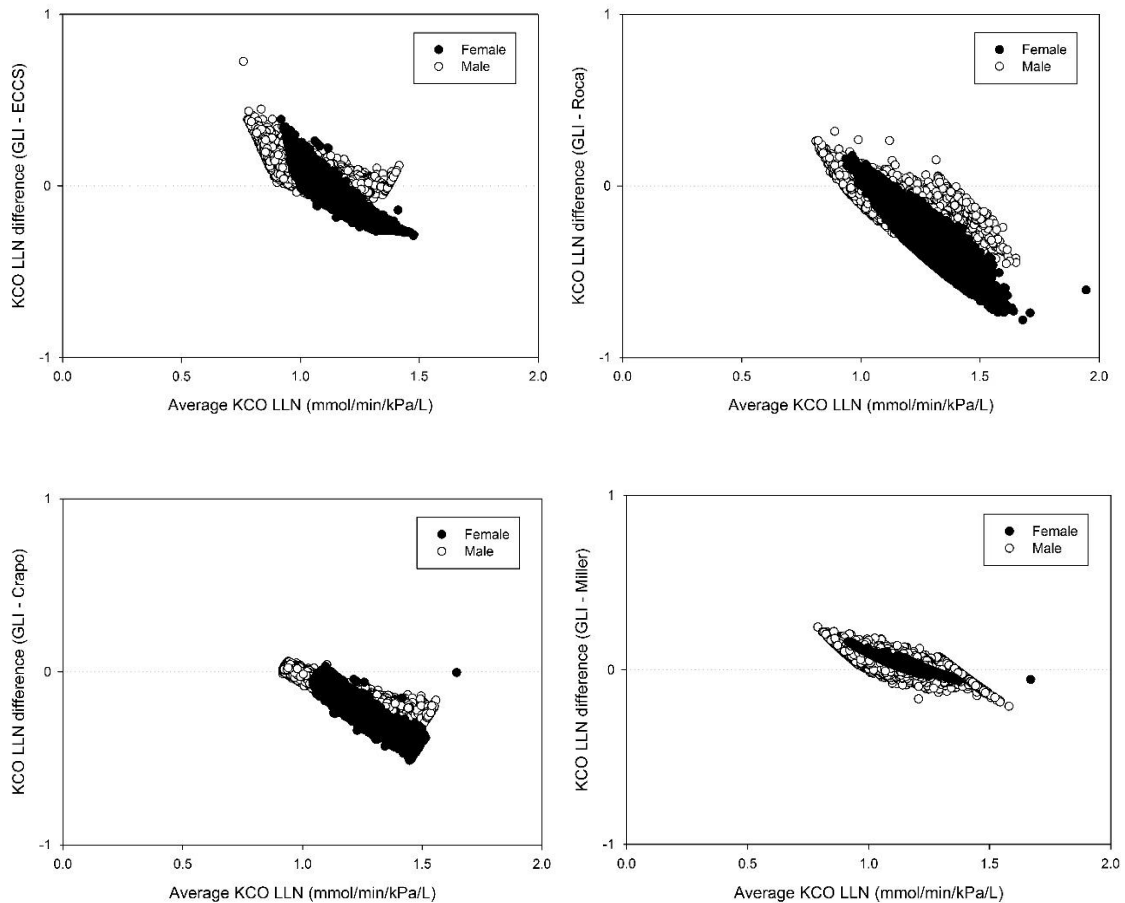

**Figure S5:** Bland-Altman plots comparing the lower limit of normal for KCO for each of the older equations (a - ECCS, b – Roca, c – Crapo, d – Miller) with that of GLI for all adults.

**Table S3:** Median (95% confidence interval) of difference between the KCO mmol/min/kPa/L) and VA LLN (L) for GLI compared to older equations for both adult males and females.

| Adult   |        | Miller              | ECCS                 | Roca                 | Crapo                |
|---------|--------|---------------------|----------------------|----------------------|----------------------|
| KCO LLN | Female | 0.05 (0.01, 0.10)   | -0.02 (-0.23, 0.16)  | -0.34 (-0.57, -0.07) | -0.19 (-0.38, -0.05) |
|         | Male   | 0.05 (-0.04, 0.13)  | 0.08 (-0.01, 0.23)   | -0.13 (-0.38, 0.04)  | -0.08 (-0.20, 0.01)  |
|         |        |                     |                      |                      |                      |
| VA LLN  | Female | -0.10 (-0.29, 0.07) | -0.08 (-0.28, 0.08)  | 0.11 (-0.11, 0.42)   | --                   |
|         | Male   | -0.20 (-0.42, 0.02) | -0.70 (-0.93, -0.48) | -0.02 (-0.49, 0.59)  | --                   |

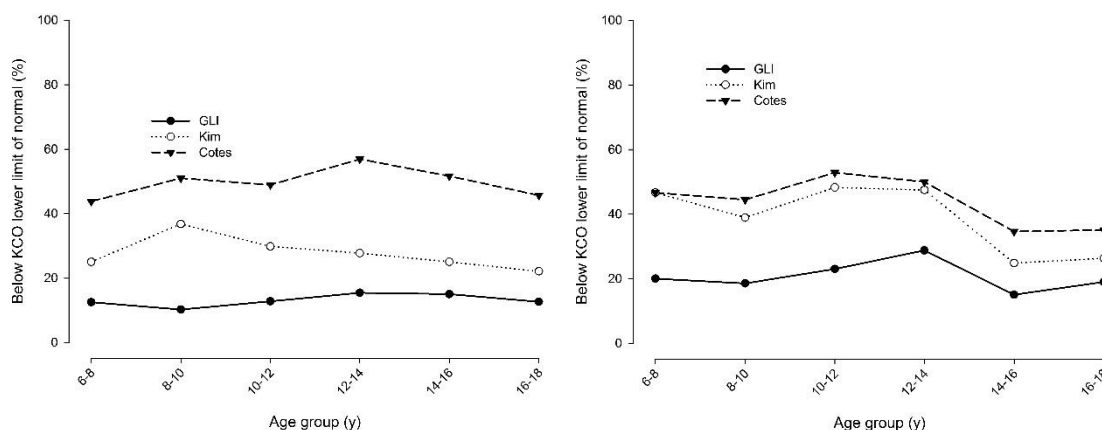

**Figure S6:** Mean KCO lower limit of normal (LLN) for each of the paediatric reference equations as a function of age, separated into females (a) and males (b).

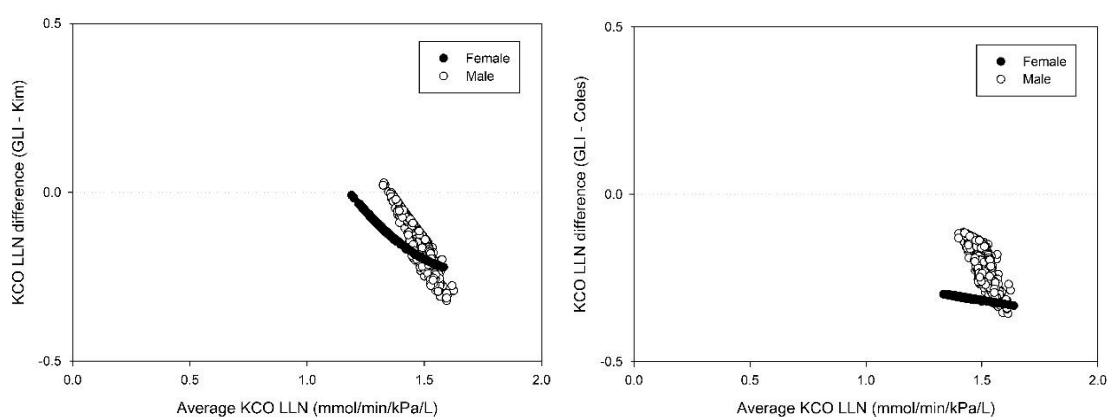

**Figure S7:** Bland-Altman plots comparing the lower limit of normal for KCO for each of the older equations (a - Kim, b - Cotes) with that of GLI for all children.

**Table S4:** Median (95% confidence interval) of difference between the KCO (mmol/min/kPa/L) and VA LLN (L) for GLI compared to older equations for both males and female children.

| Children |        | Kim                  | Cotes                |
|----------|--------|----------------------|----------------------|
| KCO LLN  | Female | -0.11 (-0.20, -0.06) | -0.31 (-0.32, -0.30) |
|          | Male   | -0.13 (-0.27, -0.02) | -0.16 (-0.30, -0.12) |
|          |        |                      |                      |
| VA LLN   | Female | 0.04 (-0.06, 0.09)   | --                   |
|          | Male   | 0.31 (0.14, 0.36)    | --                   |

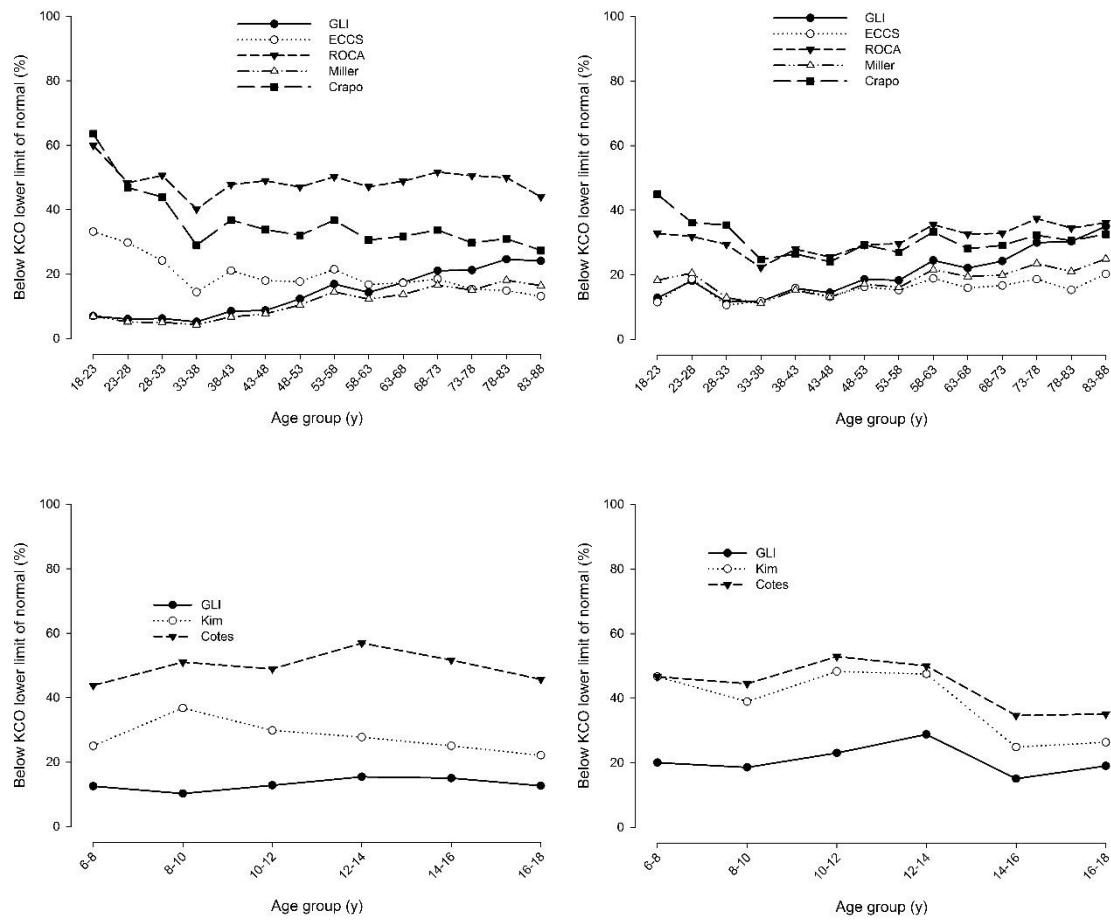

**Figure S8:** The proportion of adult females (a), adult males (b), female children (c) and male children (d) with a KCO below the lower limit of normal (LLN) using each reference equations, as a function of age.

**Table S5:** Levels of agreement for a reduced KCO (below LLN) comparing GLI equations to each of the older reference equations.

| Equation vs GLI2017 |        | Reduced KCO % raw agreement (kappa) |             |             |
|---------------------|--------|-------------------------------------|-------------|-------------|
|                     |        | all                                 | females     | males       |
| Adult               | Miller | 95.9 (0.86)                         | 96.5 (0.86) | 95.5 (0.87) |
|                     | Roca   | 78.8 (0.52)                         | 67.0 (0.33) | 89.5 (0.74) |
|                     | ECCS   | 93.3 (0.78)                         | 93.5 (0.77) | 93.0 (0.78) |
|                     | Crapo  | 88.0 (0.69)                         | 82.8 (0.56) | 92.8 (0.82) |
| Children            | Kim    | 86.0 (0.63)                         | 87.0 (0.60) | 85.2 (0.64) |
|                     | Cotes  | 71.6 (0.40)                         | 63.4 (0.27) | 78.5 (0.52) |

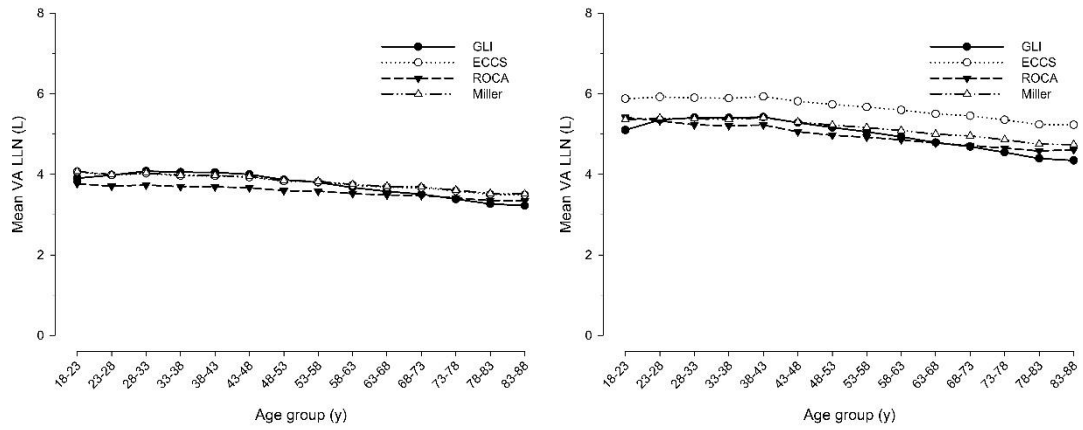

**Figure S9:** Mean VA lower limit of normal (LLN) for each of the adult reference equations as a function of age, separated into females (a) and males (b).

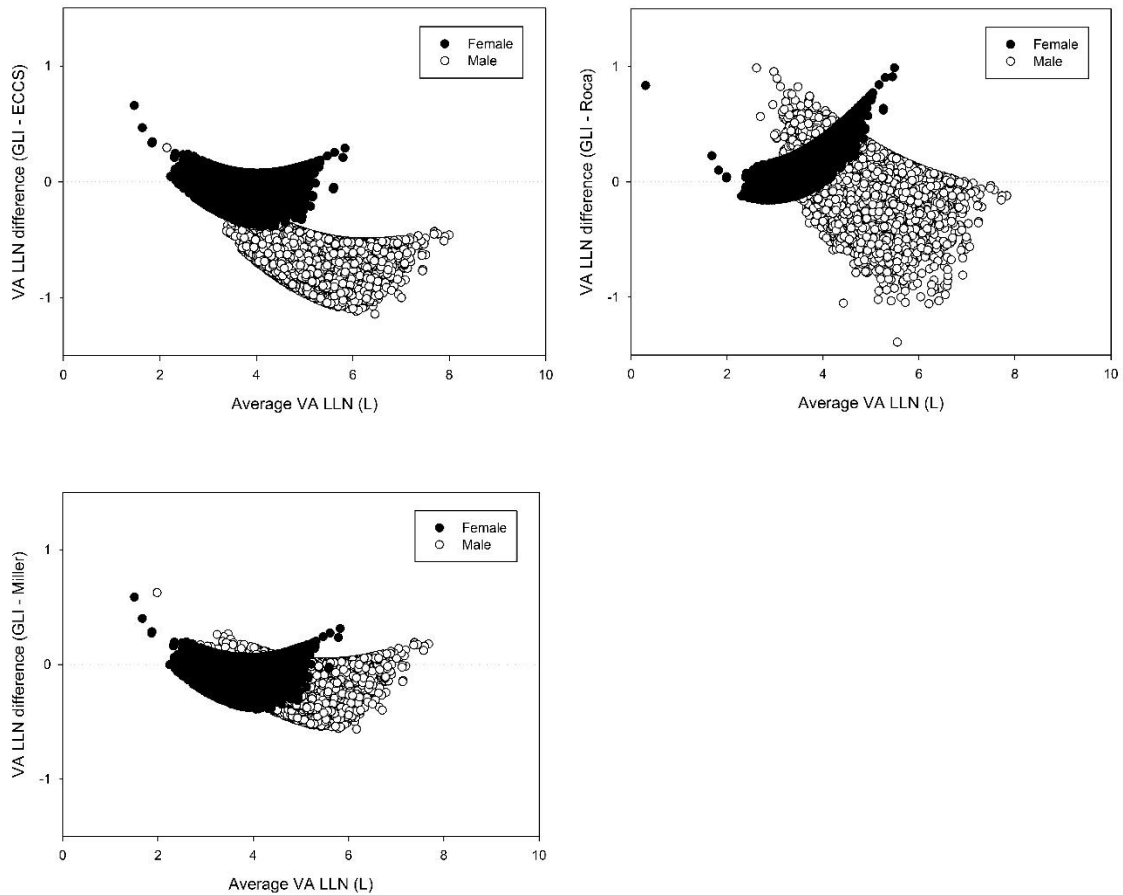

**Figure S10:** Bland-Altman plots comparing the lower limit of normal for VA for each of the older equations (a - ECCS, b – Roca, c – Miller) with that of GLI. No lower limit of normal for VA is available for the Crapo equations.

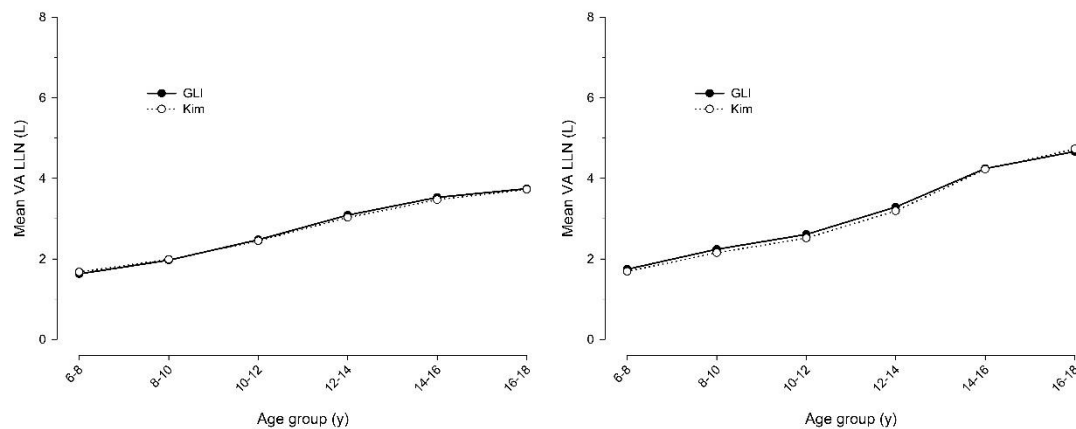

**Figure S11:** Mean VA lower limit of normal (LLN) for each of the paediatric reference equations as a function of age, separated into females (a) and males (b).

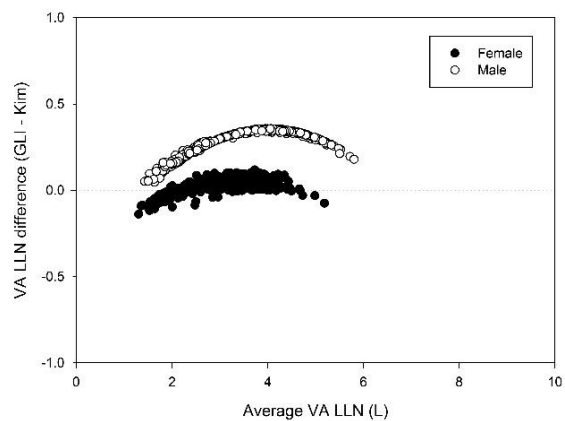

**Figure S12:** Bland-Altman plots comparing the lower limit of normal for VA for Kim equations with that of GLI. No lower limit of normal for VA is available for the Cotes equations.

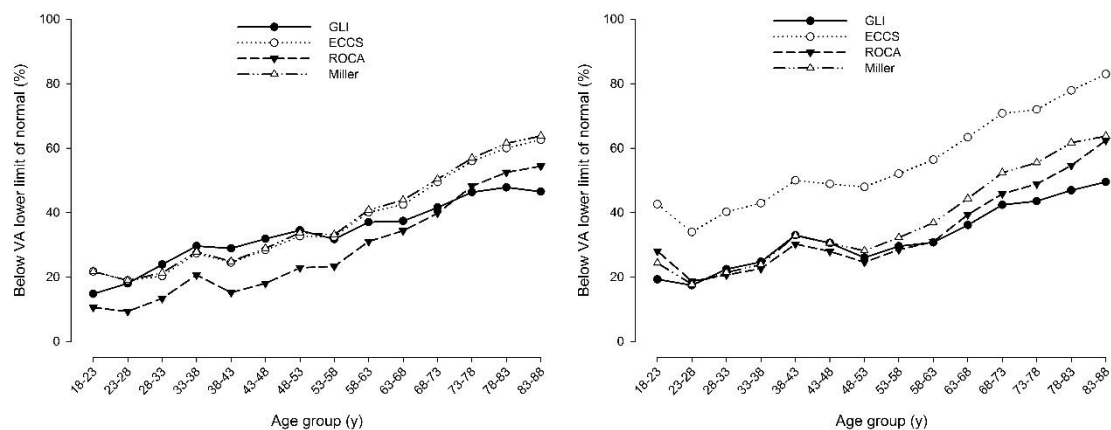

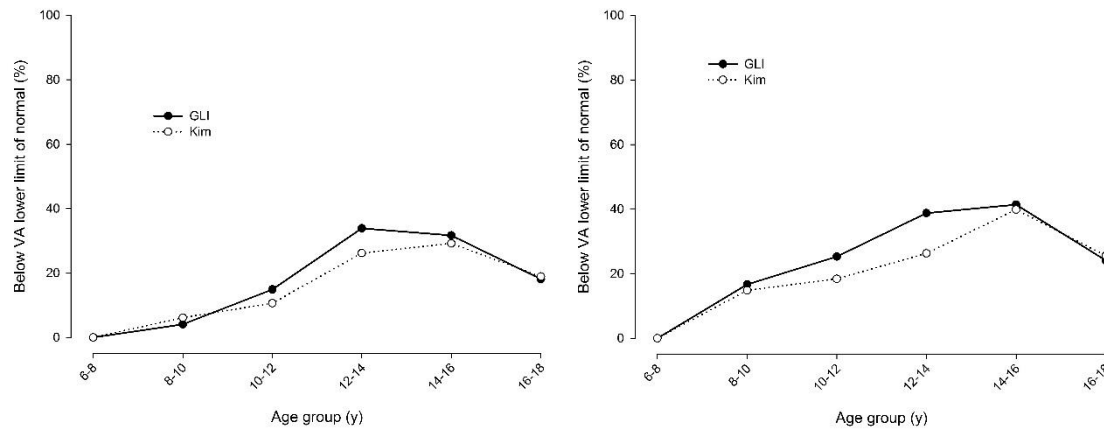

**Figure S13:** The proportion of adult females (a), adult males (b), female children (c) and male children (d) with a VA below the lower limit of normal (LLN) using each reference equations, as a function of age.

**Table S6:** Levels of agreement for a reduced VA (below LLN) comparing GLI equations to each of the older reference equations.

| Equation vs GLI2017 |        | Reduced VA % raw agreement (kappa) |             |             |
|---------------------|--------|------------------------------------|-------------|-------------|
|                     |        | all                                | females     | males       |
| Adult               | Miller | 93.0 (0.86)                        | 93.8 (0.87) | 92.4 (0.84) |
|                     | Roca   | 93.2 (0.85)                        | 93.5 (0.86) | 92.8 (0.85) |
|                     | ECCS   | 83.9 (0.68)                        | 94.2 (0.88) | 74.3 (0.51) |
| Children            | Kim    | 90.6 (0.72)                        | 98.1 (0.91) | 85.0 (0.58) |
