# Supplementary material
Source: HighWire-hosted journal article supplement (https://erj.ersjournals.com/content/55/5/1901905)
Supplement: inline-supplementary-material-2 [file inline-supplementary-material-2.pdf]

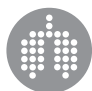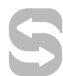

SHAREABLE PDF

# Effects of adopting the Global Lung Function Initiative 2017 reference equations on the interpretation of carbon monoxide transfer factor

Danny J. Brazzale<sup>1,2</sup>, Leigh M. Seccombe<sup>3,4</sup>, Liam Welsh<sup>5,6</sup>, Celia J. Lanteri<sup>1,2</sup>, Claude S. Farah<sup>3,4</sup> and Warren R. Ruehland<sup>1,2</sup>

**Affiliations:** <sup>1</sup>Dept of Respiratory and Sleep Medicine, Austin Hospital, Melbourne, Australia. <sup>2</sup>Institute for Breathing and Sleep, Melbourne, Australia. <sup>3</sup>Thoracic Medicine, Concord Repatriation General Hospital, Concord, Australia. <sup>4</sup>Faculty of Medicine and Health, University of Sydney, Sydney, Australia. <sup>5</sup>Dept of Respiratory and Sleep Medicine, Royal Children's Hospital, Melbourne, Australia. <sup>6</sup>Murdoch Children's Research Institute, Melbourne, Australia.

**Correspondence:** Danny J. Brazzale, Respiratory Laboratory, Austin Hospital, PO Box 5555, Heidelberg, Victoria, Australia, 3084. E-mail: danny.brazzale@austin.org.au

@ERSpublications

**Adoption of GLI  $T_{LCO}$  reference equations in adults will result in altered interpretation depending on the equations previously used and to a greater extent in adult females. The effect on interpretation in children is less significant.** <http://bit.ly/3cmRzsY>

**Cite this article as:** Brazzale DJ, Seccombe LM, Welsh L, *et al.* Effects of adopting the Global Lung Function Initiative 2017 reference equations on the interpretation of carbon monoxide transfer factor. *Eur Respir J* 2020; 55: 1901905 [<https://doi.org/10.1183/13993003.01905-2019>].

This single-page version can be shared freely online.

**ABSTRACT** The recently published Global Lung Function Initiative (GLI) carbon monoxide transfer factor ( $T_{LCO}$ ) reference equations provide an opportunity to adopt a current, all-age, widely applicable reference set. The aim of this study was to document the effect of changing to GLI from commonly utilised reference equations on the interpretation of  $T_{LCO}$  results.

33 863  $T_{LCO}$  results (48% female, 88% Caucasian, n=930 aged <18 years) from clinical pulmonary function laboratories within three Australian teaching hospitals were analysed. The lower limit of normal (LLN) and proportion of patients with a  $T_{LCO}$  below this value were calculated using GLI and other commonly used reference equations.

The average  $T_{LCO}$  LLN for GLI was similar or lower than the other equations, with the largest difference seen for CRAPO equations (median: -1.25, IQR: -1.64, -0.86 mmol·min<sup>-1</sup>·kPa<sup>-1</sup>). These differences resulted in altered rates of reduced  $T_{LCO}$  for GLI particularly for adults (+1.9% *versus* MILLER to -27.6% *versus* CRAPO), more so than for children (-0.8% *versus* KIM to -14.2% *versus* COTES). For adults, the highest raw agreement for GLI was with MILLER equations (94.7%), while for children it was with KIM equations (98.1%). Results were reclassified from abnormal to normal more frequently for younger adults, and for adult females, particularly when moving from ROCA to GLI equations (30% of females *versus* 16% of males).

The adoption of GLI  $T_{LCO}$  reference equations in adults will result in altered interpretation depending on the equations previously used and to a greater extent in adult females. The effect on interpretation in children is less significant.
